# Supplementary material for: Exploring phase transitions and magnetoelectric coupling of epitaxial asymmetric multilayer heterostructures
Source: Royal Society of Chemistry journal article supplement (doi:10.1039/d0tc02924f), 2020-01-01
Supplement: d0tc02924f1.pdf [file d0tc02924f1.pdf]

**Room Temperature Multiferroic and Magnetoelectric Properties of Epitaxial  
Asymmetric Multilayer Heterostructures**

Dhiren K. Pradhan<sup>1,2\*</sup>, Shalini Kumari<sup>3</sup>, Venkata S. Puli<sup>4</sup>, Dillip K. Pradhan<sup>5</sup>, Ashok Kumar<sup>6</sup>,  
Sergei V. Kalinin<sup>2</sup>, Rama K. Vasudevan<sup>2</sup>, Ram S. Katiyar<sup>7</sup>, Philip D. Rack<sup>1,2\*</sup>

<sup>1</sup>*Department of Materials Science & Engineering, University of Tennessee, Knoxville, Tennessee 37996, USA.*

<sup>2</sup>*Center for Nanophase Materials Sciences, Oak Ridge National Laboratory, Oak Ridge, Tennessee 37831, USA.*

<sup>3</sup>*Department of Materials Science & Engineering, The Pennsylvania State University, University Park, Pennsylvania 16802, USA.*

<sup>4</sup>*Department of Chemistry, Federal University of São Carlos, São Carlos, São Paulo 13565-905, Brazil*

<sup>5</sup>*Department of Physics & Astronomy, National Institute of Technology, Rourkela-769008, India.*

<sup>6</sup>*National Physical Laboratory (CSIR), New Delhi 110012, India.*

<sup>7</sup>*Department of Physics and Institute of Functional Nanomaterials, University of Puerto Rico, San Juan, PR 00936, USA.*

\*Authors to whom correspondence to be addressed. Electronic mail: [dhirenkumarp@gmail.com](mailto:dhirenkumarp@gmail.com)  
(Dhiren K. Pradhan), [prack@utk.edu](mailto:prack@utk.edu) (Philip D. Rack).

## Supplemental Material S1

The cross-sectional TEM image of PFN/NZFO/PFN/NZFO/PFN heterostructures recorded at higher resolution (29 K).

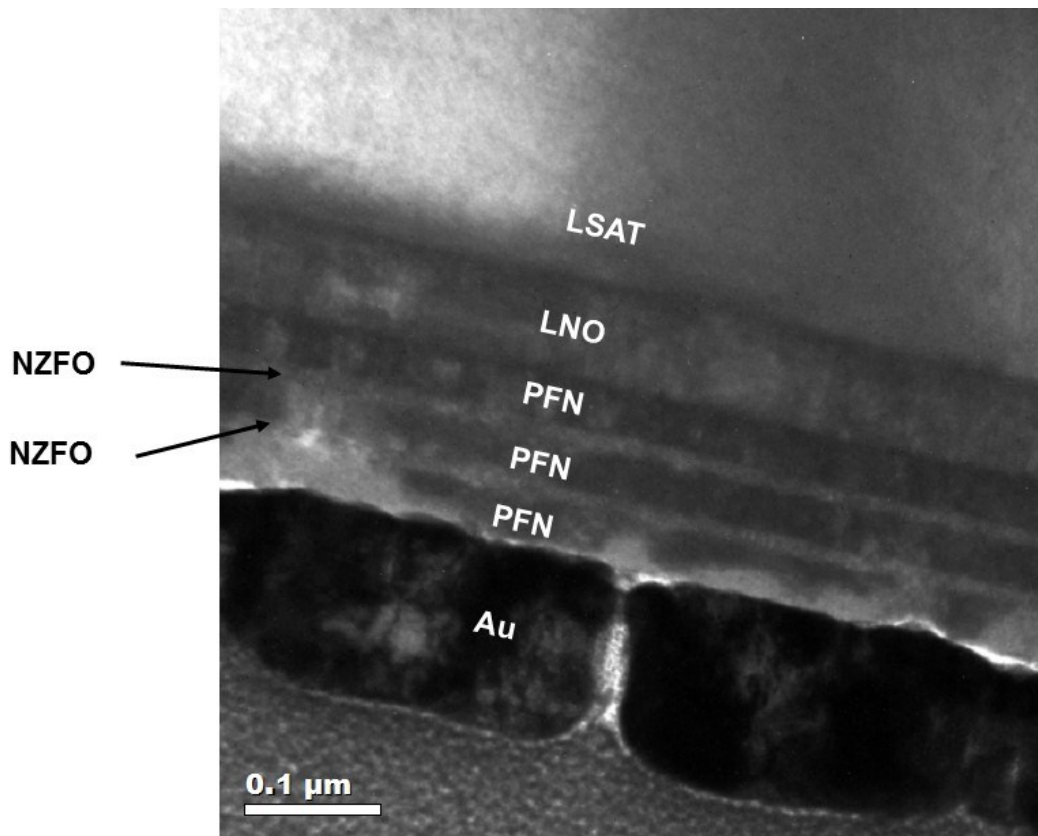

**Figure S1. Pradhan et al.**

**Fig. S1.** (Color online) The cross-sectional high resolution TEM image of a (00 $l$ ) – oriented PFN/NZFO/PFN/NZFO/PFN heterostructures deposited on LNO buffered LSAT substrates.

## Supplemental Material S2

Figure S2 depicts the STEM-EDS spectrum of the PFN/NZFO/PFN/NZFO/PFN heterostructures, showing the presence of all elements (Pb, Fe, Nb, Ni, Zn, and O) along with their respective characteristic x-ray emission lines. On the average, the Pb:Fe:Nb:Ni:Zn:O atomic ratio, estimated from the intensities of the respective characteristic lines, are in good agreement with the composition stoichiometry of the ceramic targets used to grow these heterostructures.

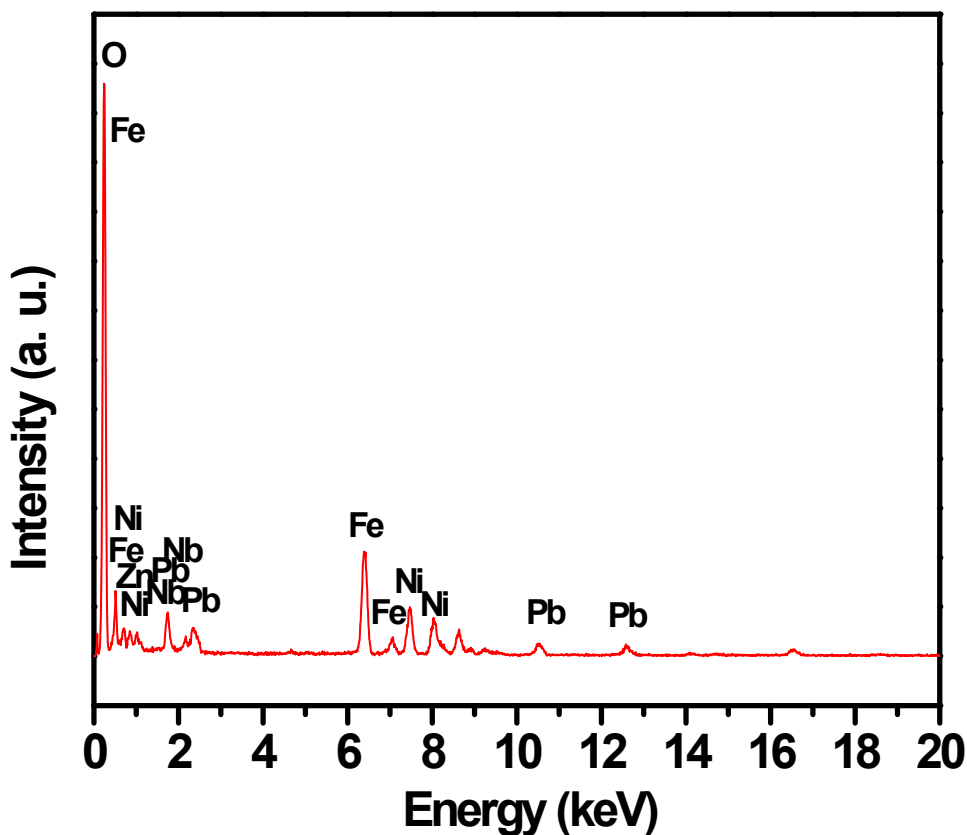

**Figure S2. Pradhan et al.**

**Fig. S2.** (Color online) EDS spectrum of PFN/NZFO/ PFN/NZFO/PFN multilayer heterostructures recorded at RT.
